# Supplementary material for: Silver encapsulated copper salen complex: efficient catalyst for electrocarboxylation of cinnamyl chloride with CO2
Source: Royal Society of Chemistry journal article supplement (doi:10.1039/c9ra05253d), 2019-01-01
Supplement: c9ra05253d1.pdf [file c9ra05253d1.pdf]

# Supporting Information

## Silver encapsulated copper salen complexes: Highly efficient catalyst for electrocarboxylation of cinnamyl chloride with CO<sub>2</sub>

La-Xia Wu<sup>a</sup>, Ying-Guo Zhao<sup>a</sup>, Ye-Bin Guan<sup>a</sup>, Hui Wang<sup>b</sup>, Yang-Chun Lan<sup>c</sup>, Huan Wang<sup>\*b</sup>, Jia-Xing Lu<sup>\*\*b</sup>

<sup>a</sup>AnHui Province Key Laboratory of Functional Coordination Compounds, School of Chemistry and Chemical Engineering, Anqing Normal University, Anqing 246011, China.

<sup>b</sup>School of Chemistry and Molecular Engineering, East China Normal University, Shanghai 200062, China.

<sup>c</sup>Department of Electrical and Electronic Engineering Southern University of Science and Technology, ShenZhen 518055, China.

\*Corresponding author. Tel: +86-21-52134935; E-mail: hwang@chem.ecnu.edu.cn

\*\*Corresponding author. Tel: +86-21-62233491; E-mail: jxlu@chem.ecnu.edu.cn

### Table of Contents

|                                                                                                                |           |
|----------------------------------------------------------------------------------------------------------------|-----------|
| <b>1. Materials and Instrument.....</b>                                                                        | <b>2</b>  |
| <b>2. General procedure.....</b>                                                                               | <b>2</b>  |
| 2.1 Preparation of cathodes.....                                                                               | 2         |
| 2.2 Electrochemical study.....                                                                                 | 3         |
| <b>3. Summary and comparison of different ways to synthesize β,γ-unsaturated<br/>    carboxylic acids.....</b> | <b>4</b>  |
| <b>4. EDX Spectrum of [Cu]@Ag and [Co]@Ag.....</b>                                                             | <b>4</b>  |
| <b>5. Energy of product in gas phase.....</b>                                                                  | <b>5</b>  |
| <b>6. NMR characterization.....</b>                                                                            | <b>5</b>  |
| <b>References.....</b>                                                                                         | <b>10</b> |

## 1. Materials and Instrument

Galvanostatic electrosynthesis was performed using a digital direct current-regulated power supply (HY3005MT, HYElec® China). Voltammetric measurements were conducted using electrochemical station (CHI650C, Chenhua) in a conventional three-electrode cell. The product yield was determined by high-performance liquid chromatography (HPLC) instrument (DIONEX Ultimate 3000 pump) (Thermo Scientific, Germering, Germany) equipped with a UV (RS Variable Wavelength) (Thermo Scientific, Germering, Germany) detector. Microstructure and morphology of [M]@Ag were analyzed using Hitachi S4800 field-emission scanning electron microscope (FE-SEM) (Hitachi, Tokyo, Japan) equipped with an energy dispersive X-Ray fluorescence spectrometer (Ametek, Oxford, UK). X-ray diffraction (XRD) (Rigaku Corporation, Tokyo, Japan) patterns were recorded by a Ultima IV X-ray powder diffractometer using Cu K $\alpha$  radiation ( $k = 1.5406 \text{ \AA}$ ).  $^1\text{H}$ NMR spectra were recorded on an AVANCE 500 (500 MHz, Bruker, Germany) spectrometer in  $\text{CDCl}_3$  with  $\text{Me}_4\text{Si}$  as an internal standard. The calculation of energy was performed in Gaussian 09 D.01 using B3LYP method with 6-31+G(d,p) set. All substrates, vinylacetic acid (**2d**) and Co-salen were used as received (Energy chemical, China). MeCN were kept over 4  $\text{\AA}$  molecular sieves.

## 2. General procedure

### 2.1 Preparation of cathodes

The synthesis process of [M]@Ag cathode was shown in Scheme S1.

Synthesis of [Cu]@Ag: In typical procedure, 16 mg Cu-salen prepared as described in literature<sup>1</sup> and 0.5 g sodium dodecyl sulfate (SDS) were added into a solution of 0.85 g  $\text{AgNO}_3$  and 50 mL distilled water. After stirring for 30 min, 0.17 g zinc powder was slowly added into the reaction system and then the solution was stirred for 8 hours at room temperature. The product was collected by centrifuging, washed with 5 mL of 1 M HCl for 2 times to remove remaining zinc powder, then washed with distilled water and ethanol for many times and dried under vacuum overnight. Finally, the powder was pressed into a coin ( $d = 2 \text{ cm}$ ) and used as cathode.

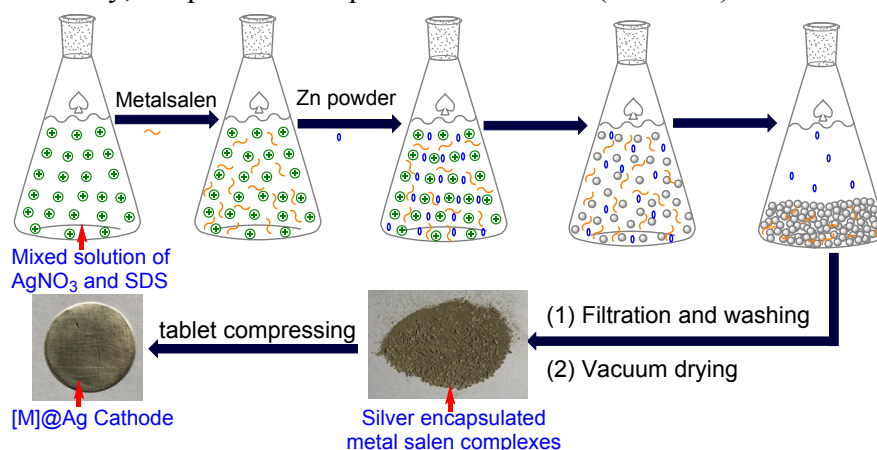

Scheme S1. Synthesis Process of [M]@Ag cathode

[Co]@Ag and Ag NPs were prepared in the same way. In case of [Co]@Ag, 16 mg of Co-salen was added into the reaction system instead of Cu-salen. In case of Ag NPs, no metal salen complex was added.

## 2.2 Electrochemical study

Electrochemical measurements were performed in a conventional three-electrode cell at a electrochemical workstation (CHI 650C). Typically, 10 mg of synthetic powder was suspended in the mixture solution of 40 uL Nafion solution (5 wt%), 750 uL deionized water and 250 uL ethanol, and a homogeneous ink was formed by ultrasound for 1 h. Then, 6 uL of the ink was loaded onto a glassy carbon electrode (GC) with 1 mm radius. The electrochemical behavior of **1a** was scanned at different cathodes ([Cu]@Ag, [Co]@Ag, Ag NPs) in tetraethylammonium chloride-acetonitrile (TEACl-MeCN) solution with a sweep rate of 0.2 V s<sup>-1</sup> in a nitrogen atmosphere. The counter and the reference electrodes were the platinum sheet (1 cm × 2 cm) the Ag/AgI/0.1 mol L<sup>-1</sup> TBAI respectively.

Typical electrocatalytic carboxylation was conducted in a mixture of 50 mM cinnamyl chloride (**1a**), 0.1 M TEACl and 10 mL MeCN saturated with CO<sub>2</sub> (1 atm) in an undivided cell equipped with [Cu]@Ag cathode and Mg rod anode in One-compartment electrolytic cell. During the electrolysis process, CO<sub>2</sub> bubbles are always bubbling into the reaction system. The electrolysis was stopped after the consumption of 2.0 F/mol of **1a**. At the end of the electrolysis, MeCN was removed under reduced pressure, the rest was hydrolyzed with hydrochloric acid (0.2 M, 15 mL) and extracted with Et<sub>2</sub>O (15 mL) for 4 times. Combined ethereal layers and dried with MgSO<sub>4</sub> for 4 h, after then remove the solvent under reduced pressure, products **2a** and **3a** were purified using flash chromatography (Petroleum ether-ethyl acetate 16:1) and characterized by <sup>1</sup>H NMR and <sup>13</sup>C NMR. The yields were determined by high-performance liquid chromatography (HPLC).

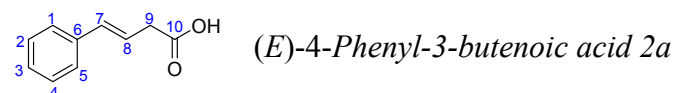

<sup>1</sup>H NMR (500 MHz, CDCl<sub>3</sub>) δ 7.43-7.38 (m, 2H), 7.34 (t, J = 7.6 Hz, 2H), 7.28-7.24 (m, 1H), 6.55 (d, J = 15.9 Hz, 1H), 6.31 (dt, J = 15.9, 7.1 Hz, 1H), 3.33 (dd, J = 7.1, 1.4 Hz, 2H). <sup>13</sup>C NMR (101 MHz, CDCl<sub>3</sub>) δ 178.24 (C-10), 136.66 (C-6), 134.05 (C-7), 128.60 (C-2, C-4), 127.74 (C-3), 126.37 (C-1, C-5), 120.80 (C-8), 38.08 (C-9) ppm.

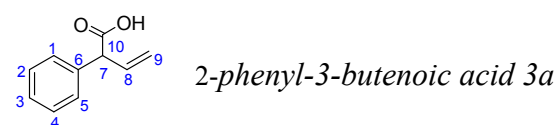

<sup>1</sup>H NMR (500 MHz, CDCl<sub>3</sub>) δ 7.44 -7.29 (m, 5H), 6.24 (ddd, J = 17.7, 10.2, 8.0 Hz, 1H), 5.40-5.05 (m, 2H), 4.36 (d, J = 8.0 Hz, 1H). <sup>13</sup>C NMR (101 MHz, CDCl<sub>3</sub>) δ 178.71 (C-10), 137.40 (C-6), 135.00 (C-8), 128.86 (C-2, C-4), 128.15 (C-1, C-5), 127.67 (C-3), 118.15 (C-9), 55.58 (C-7) ppm.

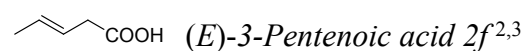

<sup>1</sup>H NMR (400 MHz, CDCl<sub>3</sub>) δ 9.55 (s, 1H), 5.82-5.40 (m, 2H), 3.12 (dd, J = 6.9, 6.6 Hz, 2H), 1.79-1.56 (m, 3H) ppm.

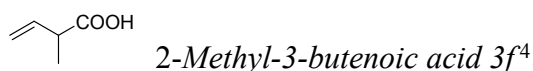

<sup>1</sup>H NMR (400 MHz, CDCl<sub>3</sub>) δ 10.69 (s, 1H), 5.94 (ddd, J = 17.4, 10.3, 7.4 Hz, 1H), 5.27-5.09 (m, 2H), 3.19 (pt, J = 7.1, 1.2 Hz, 1H), 1.31 (d, J = 7.0 Hz, 3H) ppm.

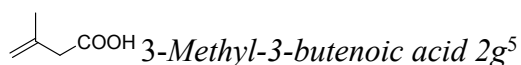

<sup>1</sup>H NMR (500 MHz, CDCl<sub>3</sub>) δ 4.98 (p, J = 1.6 Hz, 1H), 4.91 (t, J = 1.5 Hz, 1H), 3.11 (d, J = 1.2 Hz, 2H), 1.86 (s, J = 1.1 Hz, 3H) ppm.

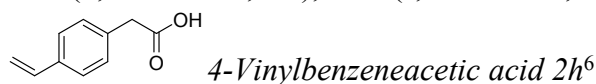

<sup>1</sup>H NMR (500 MHz, CDCl<sub>3</sub>) δ 7.43-7.25 (m, 3H), 7.25-7.10 (m, 1H), 6.72 (dd, J = 17.6, 10.9 Hz, 1H), 5.77 (ddd, J = 17.6, 8.9, 0.9 Hz, 1H), 5.27 (ddd, J = 10.9, 9.0, 0.9 Hz, 1H), 3.67 (d, J = 3.2 Hz, 2H) ppm.

### 3. Summary and comparison of different ways to synthesize β,γ-unsaturated carboxylic acids

Table S1 Summary and comparison of different methods for the preparation of β,γ-unsaturated carboxylic acids

| Entry | Model substrate | Catalyst                 | Reductant                       | Yield /% (L:B) <sup>a</sup> | Ref       |
|-------|-----------------|--------------------------|---------------------------------|-----------------------------|-----------|
| 1     |                 | NiBr <sub>2</sub> ·glyme | Mn & Zn (2.4 equiv.)            | 77 (99:1)                   | 7         |
| 2     |                 | Ni(acac) <sub>2</sub>    | Mn (2.0 equiv.)                 | 88 (L)                      | 8         |
| 3     |                 | PdCl <sub>2</sub>        | Et <sub>2</sub> Zn (3.0 equiv.) | 94 (B)                      | 9         |
| 4     |                 | NiBr <sub>2</sub> ·glyme | Zn (4 equiv.)                   | 70 (99:1)                   | 10        |
| 5     |                 | -                        | In (0.67equiv.)                 | 72 (L)                      | 11        |
| 6     |                 | -                        | Zn (1.05 equiv.)                | 87 (B)                      | 12        |
| 7     |                 | Pd(OAc) <sub>2</sub>     | Electric current                | 85 (1:20)                   | 13        |
| 8     |                 | [Cu]@Ag electrode        | Electric current                | 98 (3:1)                    | This work |

<sup>a</sup> L = Linear structure, B = Branch structure.

### 4. EDX Spectrum of [Cu]@Ag and [Co]@Ag

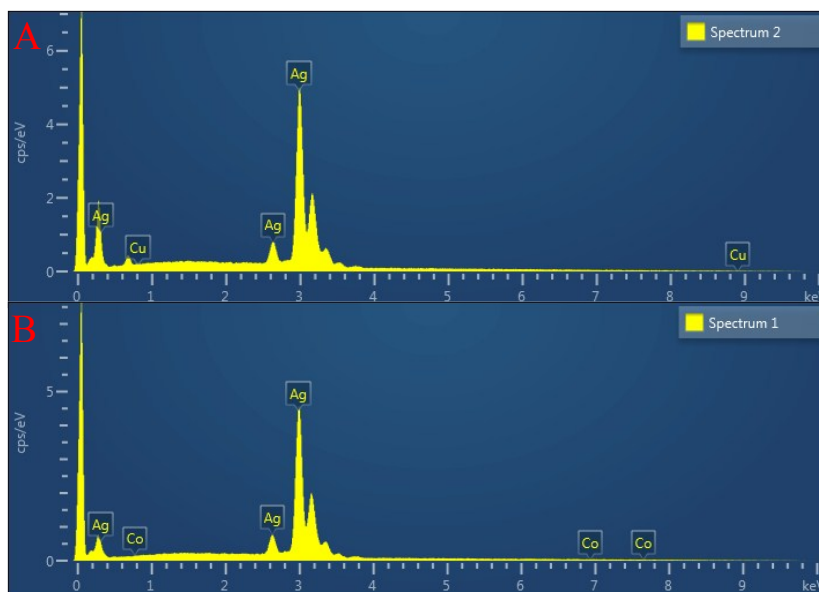

Figure S1. EDX Spectrum of [Cu]@Ag (A); [Co]@Ag composite (B)

## 5. Energy of product in gas phase

Table S2 Energy of product in gas phase<sup>a</sup>

| Entry | Product                                      | Energy/Hartree <sup>b</sup> |
|-------|----------------------------------------------|-----------------------------|
| 1     | <chem>C=C(Cc1ccccc1)CC(=O)O</chem> <b>2a</b> | -537.573                    |
| 2     | <chem>C=C(C(=O)O)c1ccccc1</chem> <b>3a</b>   | -537.562                    |
| 3     | <chem>C=C(C)CC(=O)O</chem> <b>2f</b>         | -345.825                    |
| 4     | <chem>C=C(C)C(=O)O</chem> <b>3f</b>          | -345.819                    |

<sup>a</sup>: Calculations were performed in Gaussian 09 D.01 using B3LYP method with 6-31+G(d,p) set.

<sup>b</sup>: 1 Hartree = 627.51 Kcal mol<sup>-1</sup>.

## 6. NMR characterization



wlx0812-1.1.fid  
wlx0812-1

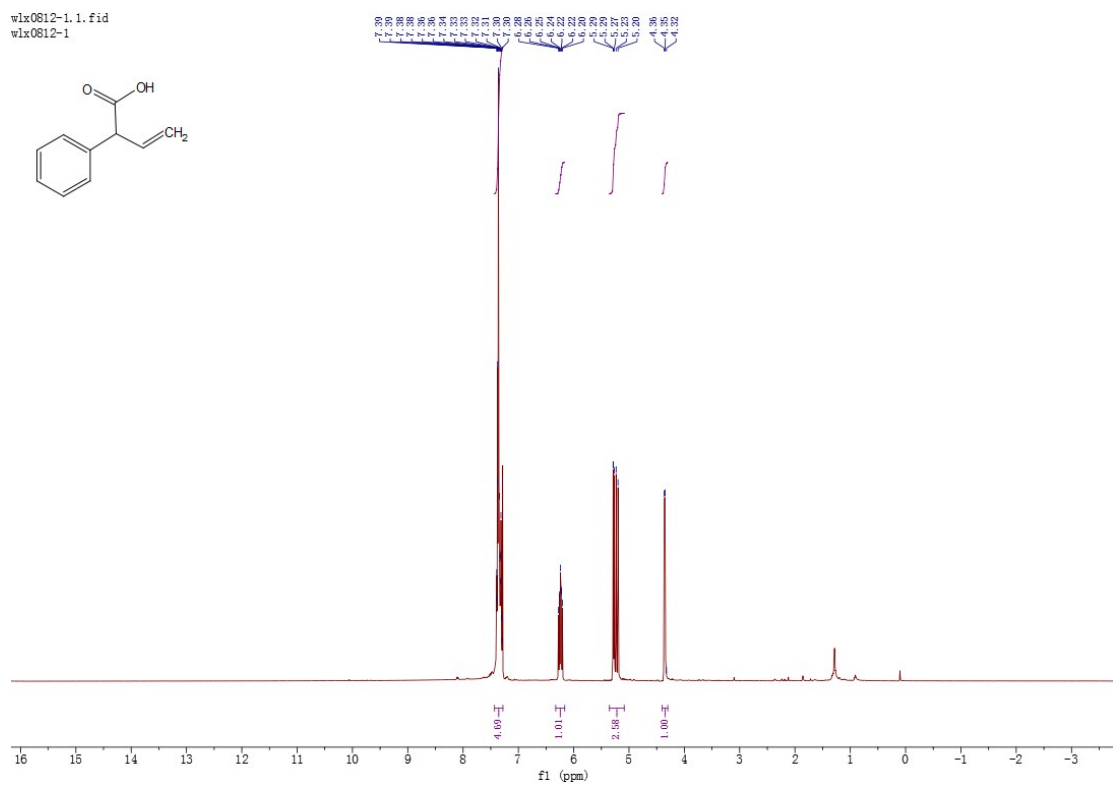

<sup>1</sup>H NMR (500 MHz, CDCl<sub>3</sub>) of 2-phenyl-3-butenoic acid **3a**

WLX20190110-2-CNMR.10.fid

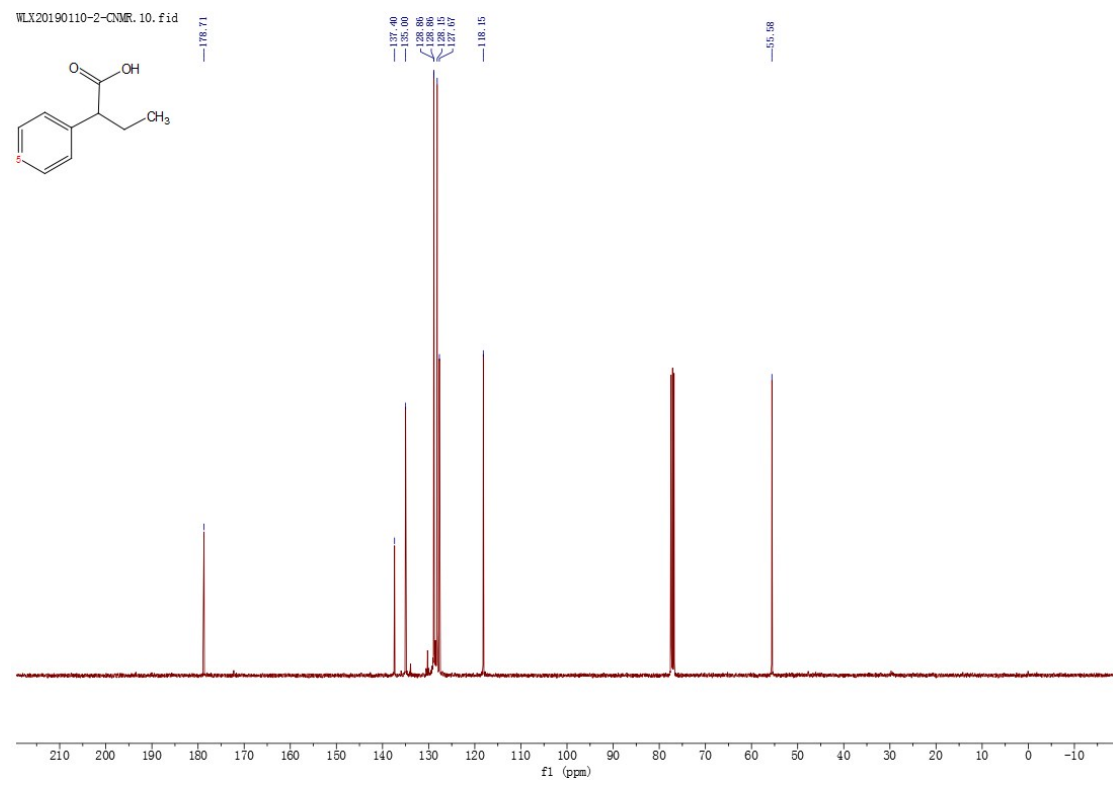

<sup>13</sup>C NMR (101 MHz, CDCl<sub>3</sub>) of 2-phenyl-3-butenoic acid **3a**

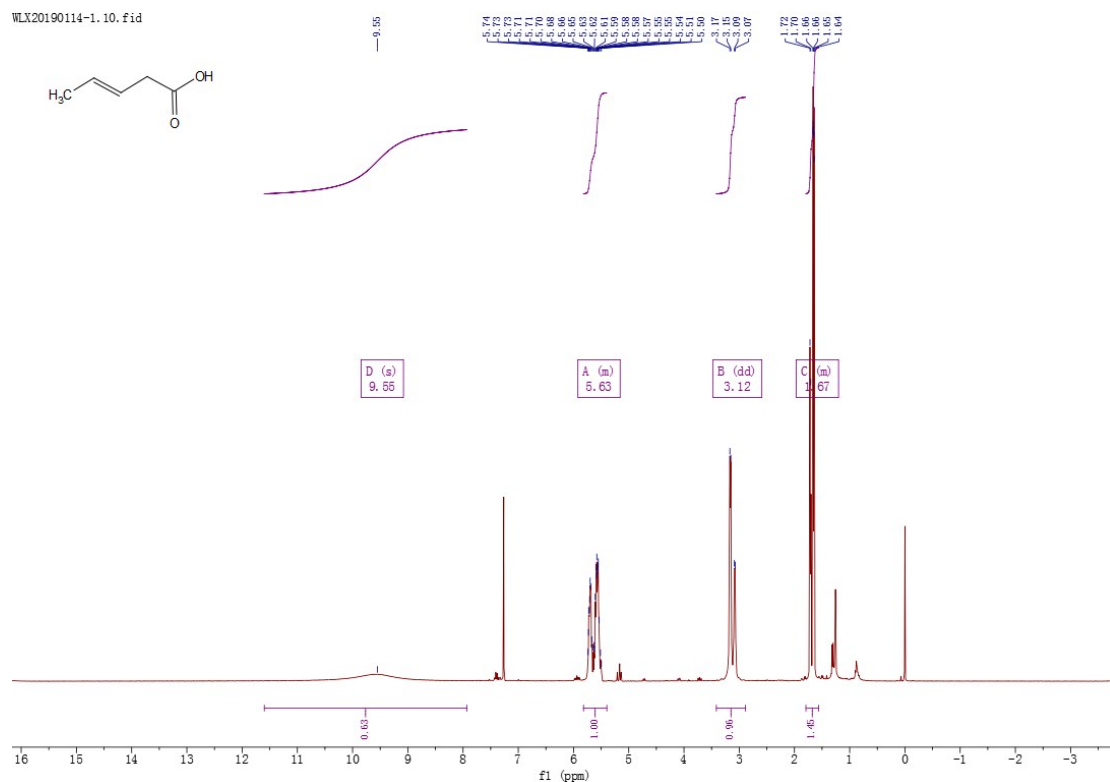

<sup>1</sup>HNMR (400 MHz, CDCl<sub>3</sub>) of (*E*)-3-pentenoic acid **2f**

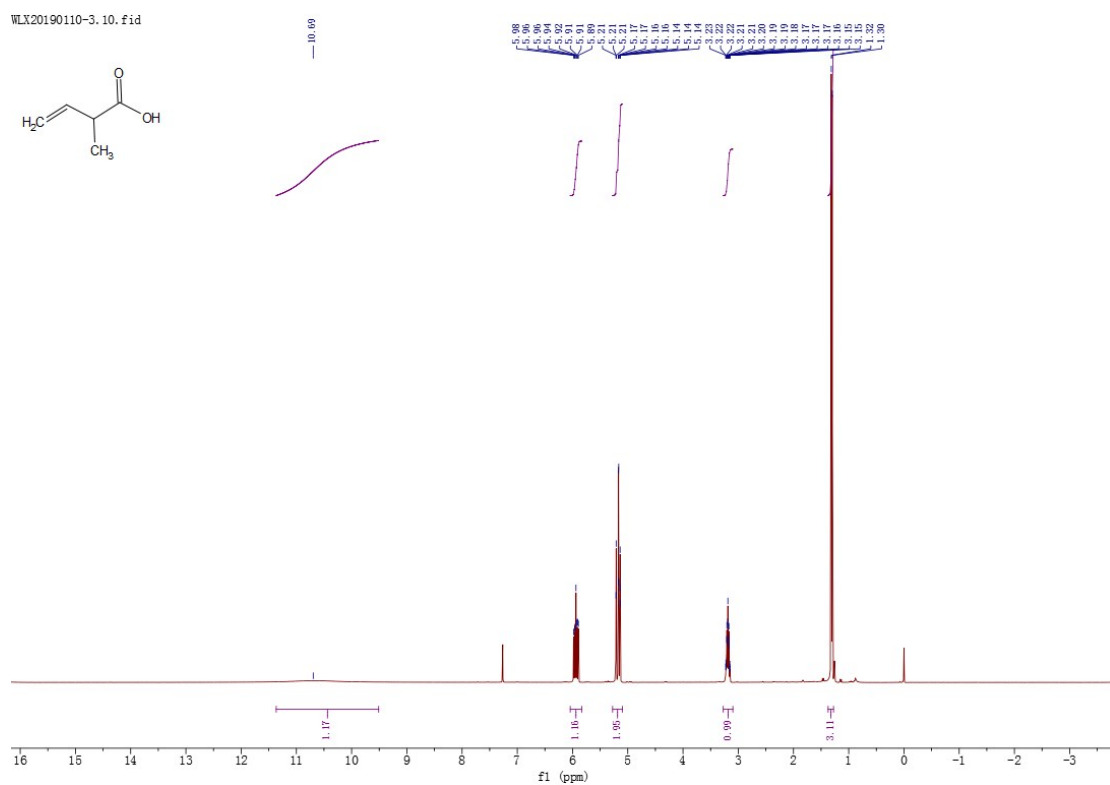

<sup>1</sup>HNMR (400 MHz, CDCl<sub>3</sub>) of 2-Methyl-3-butenoic acid **3f**



WIX0808-2.1.fid  
WIX0808-2

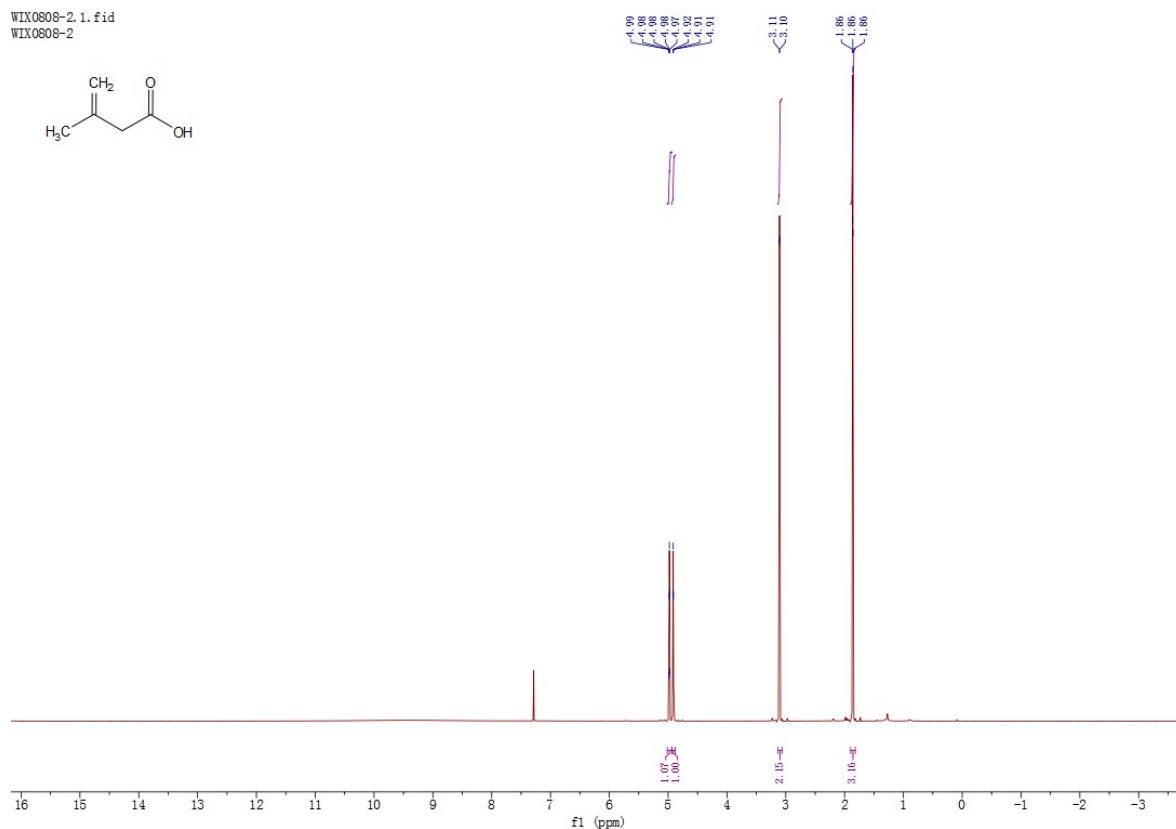

$^1\text{H}$ NMR (500 MHz,  $\text{CDCl}_3$ ) 3-Methyl-3-butenoic acid **2g**

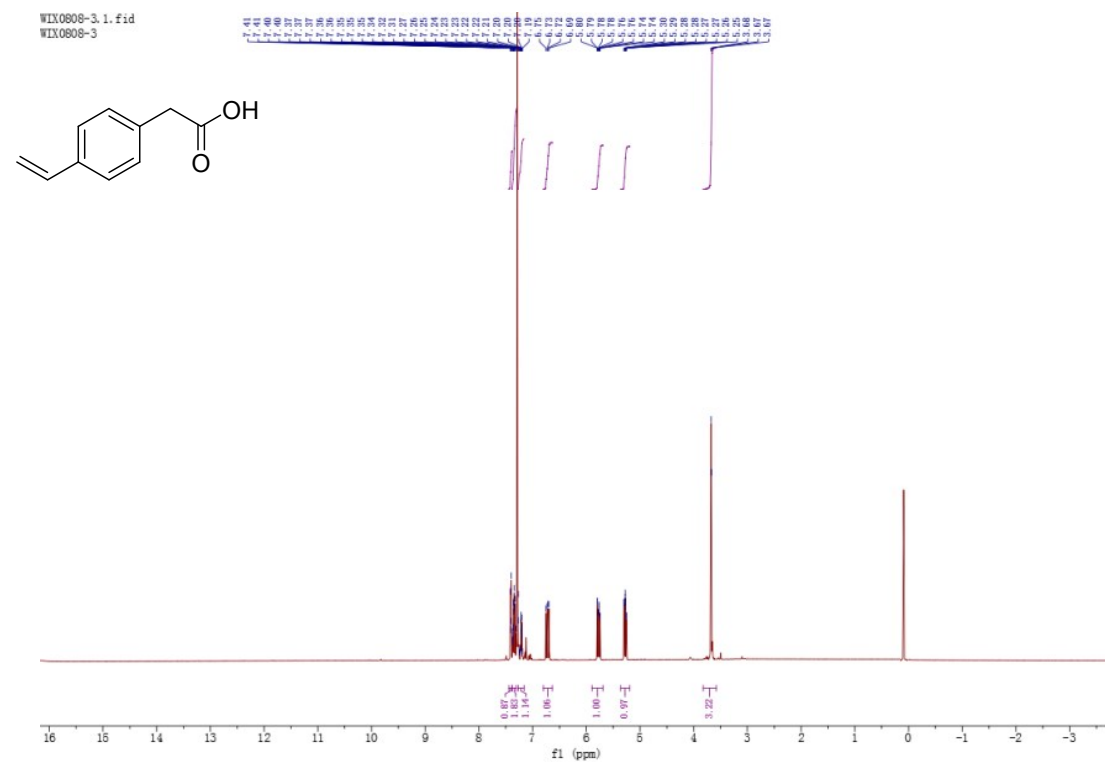

$^1\text{H}$ NMR (500 MHz,  $\text{CDCl}_3$ ) 4-Vinylbenzeneacetic acid **2h**

## Reference

1. X. B. Lu, X. J. Feng and R. He, *Appl Catal a-Gen*, 2002, **234**, 25-33.
2. J. Thibonnet, M. Abarbri, J.-L. Parrain and A. Duchêne, *Tetrahedron*, 2003, **59**, 4433-4441.
3. S. J. Zhang and W. X. Hu, *Synthetic Communications*, 2010, **40**, 3093-3100.
4. H. A. Duong, P. B. Huleatt, Q. W. Tan and E. L. Shuying, *Org Lett*, 2013, **15**, 4034-4037.
5. D. F. Niu, L. P. Xiao, A. J. Zhang, G. R. Zhang, Q. Y. Tan, J. X. Lu, *Tetrahedron*, 2008, **64**, 10517-10520.
6. S. Zhang, W. Q. Chen, A. Yu and L. N. He, *Chemcatchem*, 2015, **7**, 3972-3977.
7. T. Moragas, J. Cornella, R. Martin, *J. Am. Chem. Soc.* 2014, **136**, 17702-17705.
8. Y.G. Chen, B. Shuai, C. Ma, X.J. Zhang, P. Fang, T.S. Mei, *Org. Lett.* 2017, **19**, 2969-2972.
9. T. Mita, Y. Higuchi, Y. Sato, *Chem. Eur. J.* 2015, **21**, 16391-16394.
10. M. van Gemmeren, M. Borjesson, A. Tortajada, S.Z. Sun, K. Okura, R. Martin, *Angew Chem Int Ed Engl* 2017, **56**, 6558-6562.
11. B. Miao, S. Ma, *Chem Commun*, 2014, **50**, 3285-3287.
12. B. Miao, S. Ma, *Org. Chem. Front.* 2015, **2**, 65-68.
13. K. J. Jiao, Z. M. Li, X. T. Xu, L. P. Zhang, Y. Q. Li, K. Zhang, T. S. Mei, *Org. Chem. Front.* **2018**, **5**, 2244-2248.
